# Supplementary material
Source: publisher figshare collection journal article supplement (https://frontiersin.figshare.com/ndownloader/files/30724439)
Supplement: Supplementary file 1 [file 30724439]

# Welcoming wolves? Governing the return of large carnivores in traditional pastoral landscapes

1. *Table SII. Key informants interviewed for the study. When the code contains lowercase letters, it means that several informants were present/interviewed on the same occasion.*

| Location A |               |                                |                |              |           |                   |                                                    |
|------------|---------------|--------------------------------|----------------|--------------|-----------|-------------------|----------------------------------------------------|
| Code       | Study area    | Interview venue                | Interview type | Gender       | Age range | Category          | Property/specialty*                                |
| A1         | La Carballeda | Office                         | Formal         | Male         | 45-60     | Local authorities | Depopulation/Land abandonment                      |
| A2         | La Carballeda | Public space                   | Formal         | Male         | 20-45     | Business sector   | Hospitality sector                                 |
| A3         | La Carballeda | Public space                   | Informal       | Male         | 60-85     | Hunter            | Hunting                                            |
| A4         | La Carballeda | Public space                   | Formal         | Male         | 45-60     | Business sector   | Nature tourism sector/large carnivore conservation |
| A5         | La Carballeda | Home                           | Formal         | Female       | 20-45     | Local authorities | Depopulation/Land abandonment                      |
| A6         | Sanabria      | Home                           | Formal         | Male         | 45-60     | Civil servant     | Hunting                                            |
| A7         | La Carballeda | Farm visit/participant herding | Formal         | Male         | 45-60     | Sheep farmer      | Traditional farming and agriculture                |
| A8         | La Carballeda | Farm visit/participant herding | Formal         | Male         | 60-85     | Sheep farmer      | Traditional farming and agriculture                |
| A9         | La Carballeda | Home                           | Formal         | Female       | 60-85     | Business sector   | Hospitality sector                                 |
| A10        | La Carballeda | Office                         | Formal         | Male         | 45-60     | Civil servant     | Wildfire prevention                                |
| A11        | Sanabria      | Farm visit/participant herding | Formal         | Female       | 45-60     | Sheep farmer      | Traditional farming and agriculture                |
| A12a, b, c | Sanabria      | Farm visit/participant herding | Formal         | Male, female | 20-45     | Cattle farmers    | Traditional farming and agriculture, Hunting       |
| A13        | Sanabria      | Public space                   | Formal         | Male         | 60-85     | Civil servant     | Large carnivore conservation                       |
| A14        | Sanabria      | Home                           | Formal         | Female       | 20-45     | NGO official      | Traditional farming and agriculture                |
| A15a, b, c | Sanabria      | Farm visit/participant herding | Formal         | Male, female | 20-45     | Farmers, sheep    | Traditional farming and agriculture                |
| A16        | Sanabria      | Farm visit/participant herding | Formal         | Female       | 20-45     | Cattle farmer     | Traditional farming and agriculture                |
| A17        | La Carballeda | Farm visit/participant herding | Formal         | Male         | 20-45     | Cattle farmer     | Traditional farming and agriculture                |
| A18        | Independent   | Public space                   | Formal         | Female       | 20-45     | Farmer's union    | Traditional farming and agriculture                |
| A19        | La Carballeda | Office                         | Formal         | Male         | 45-60     | Civil servant     | Hunting                                            |
| A20        | La Carballeda | Home                           | Informal       | Male         | 60-85     | Civil servant     | Hunting                                            |
| A21        | La Carballeda | Public space                   | Informal       | Male         | 60-85     | Hunter            | Hunting                                            |
| A22        | Sanabria      | Office                         | Formal         | Male         | 60-85     | Local authorities | Depopulation/Land abandonment                      |

|            |               |                                |        |      |       |                      |                                                    |
|------------|---------------|--------------------------------|--------|------|-------|----------------------|----------------------------------------------------|
| <b>A23</b> | La Carballeda | Farm visit/participant herding | Formal | Male | 45-60 | Sheep farmer         | Traditional farming and agriculture                |
| <b>A24</b> | Sanabria      | Office                         | Formal | Male | 45-60 | Local authorities    | Depopulation/Land abandonment                      |
| <b>A25</b> | Sanabria      | Public space                   | Formal | Male | 45-60 | Local authorities    | Countryside and landscape protection               |
| <b>A26</b> | Sanabria      | Home                           | Formal | Male | 20-45 | Civil servant        | Countryside and landscape protection               |
| <b>A27</b> | Regional      | Office                         | Formal | Male | 20-45 | Regional authorities | Hunting                                            |
| <b>A28</b> | Regional      | Online                         | Formal | Male | 45-60 | Regional authorities | Protected area management                          |
| <b>A29</b> | La Carballeda | Online                         | Formal | Male | 45-60 | Business sector      | Nature tourism sector/large carnivore conservation |

| Location B |                 |                                |                |              |           |                                  |                                                                           |
|------------|-----------------|--------------------------------|----------------|--------------|-----------|----------------------------------|---------------------------------------------------------------------------|
| Code       | Study area      | Interview venue                | Interview type | Gender       | Age range | Category                         | Property/specialty*                                                       |
| B1         | Outside of PENP | Farm visit/participant herding | Formal         | Male         | 45-60     | Cattle farmer/<br>Farmer's union | Traditional farming and agriculture, Countryside and landscape protection |
| B2         | Within PENP     | Office                         | Formal         | Male         | 45-60     | Civil servant                    | Protected area management                                                 |
| B3         | Independent     | Online                         | Formal         | Male         | 45-60     | Research/academia                | Large carnivore conservation                                              |
| B4         | Within PENP     | Farmer/business                | Formal         | Female       | 20-45     | Dairy farmer/cheese maker        | Modern farming and agriculture                                            |
| B5         | Within PENP     | Farmer/business                | Formal         | Male         | 20-45     | Goat farmer/cheese maker         | Traditional farming and agriculture                                       |
| B6         | Within PENP     | Office                         | Formal         | Male         | 20-45     | Local authorities                | Farming and agriculture                                                   |
| B7         | Within PENP     | Office                         | Formal         | Male         | 20-45     | Local authorities                | Depopulation/Land abandonment, Traditional farming and agriculture        |
| B8         | Within PENP     | Office                         | Formal         | Male         | 45-60     | Civil servant/business sector    | Depopulation/Land abandonment, Traditional farming and agriculture        |
| B9         | Within PENP     | Public space                   | Formal         | Male         | 45-60     | Civil servant                    | Large carnivore conservation/Nature restoration                           |
| B10ab      | Within PENP     | Farm visit/participant herding | Informal       | Female, male | 60-85     | Dairy farmers/cheese makers      | Traditional farming and agriculture                                       |
| B11        | Regional        | Office                         | Informal       | Male         | 45-60     | Policy advocate                  | Traditional farming and agriculture, Countryside and landscape protection |
| B12        | Within PENP     | Public space                   | Formal         | Male         | 45-60     | Cattle farmer                    | Traditional farming and agriculture, Countryside and landscape protection |
| B13        | Independent     | Public space                   | Formal         | Male         | 45-60     | NGO official                     | Large carnivore conservation                                              |
| B14        | Independent     | Public space                   | Formal         | Male         | 20-45     | Research/academia /Cattle farmer | Traditional farming and agriculture, Countryside and landscape protection |
| B15        | Within PENP     | Researcher/Civil servant       | Formal         | Female       | 20-45     | Civil servant                    | Countryside and landscape protection/Species protection                   |

|            |                 |                                |        |        |       |                                    |                                                                           |
|------------|-----------------|--------------------------------|--------|--------|-------|------------------------------------|---------------------------------------------------------------------------|
| <b>B16</b> | Within PENP     | Public space                   | Formal | Male   | 20-45 | NGO oficial/local asociación       | Traditional farming and agriculture, Countryside and landscape protection |
| <b>B17</b> | Within PENP     | Public space                   | Formal | Male   | 60-85 | Research/academia                  | Traditional farming and agriculture, Countryside and landscape protection |
| <b>B18</b> | Within PENP     | Farm visit/participant herding | Formal | Male   | 20-45 | Dairy farmer/cheese maker          | Traditional farming and agriculture                                       |
| <b>B19</b> | Within PENP     | Farm visit/participant herding | Formal | Male   | 60-85 | Dairy farmer/cheese maker          | Traditional farming and agriculture                                       |
| <b>B20</b> | Within PENP     | Farm visit/participant herding | Formal | Male   | 45-60 | Nature tourism sector /agriculture | Hospitality, Traditional farming and agriculture                          |
| <b>B21</b> | Within PENP     | Office                         | Formal | Male   | 20-45 | Civil servant/researcher           | Traditional farming and agriculture, protected area management            |
| <b>B22</b> | Regional        | Office                         | Formal | Male   | 45-60 | Regional authorities               | Protected area management                                                 |
| <b>B23</b> | Within PENP     | Farm visit/participant herding | Formal | Male   | 20-45 | Dairy farmer/cheese maker          | Traditional farming and agriculture                                       |
| <b>B24</b> | Within PENP     | Public space                   | Formal | Female | 45-60 | Civil servant/ Local association   | Nature tourism sector                                                     |
| <b>B25</b> | Outside of PENP | Home                           | Formal | Male   | 45-60 | Cattle farmer/hunter               | Hunting, Traditional farming and agriculture                              |
| <b>B26</b> | Outside of PENP | Farm visit/participant herding | Formal | Male   | 20-45 | Sheep farmer                       | Traditional farming and agriculture                                       |
| <b>B27</b> | Within PENP     | Home                           | Formal | Male   | 45-60 | NGO official                       | Species conservation                                                      |
| <b>B28</b> | Outside of PENP | Office                         | Formal | Male   | 45-60 | Civil servant                      | Protected area management                                                 |
| <b>B29</b> | Within PENP     | Office                         | Formal | Male   | 45-60 | Cattle farmer                      | Traditional farming and agriculture                                       |
| <b>B30</b> | Regional        | Office                         | Formal | Male   | 45-60 | Regional authorities               | Large carnivore conservation                                              |
| <b>B31</b> | Outside of PENP | Office                         | Formal | Male   | 45-60 | Civil servant                      | Large carnivore conservation                                              |

| Location C |            |                                |                |              |       |                                                |                                                                           |
|------------|------------|--------------------------------|----------------|--------------|-------|------------------------------------------------|---------------------------------------------------------------------------|
| Code       | Study area | Interview venue                | Interview type | Gender       | Age   | Category                                       | Property/specialty*                                                       |
| C1         | La Vera    | Office                         | Formal         | Male         | 45-60 | Local authorities                              | Depopulation/land abandonment                                             |
| C2         | La Vera    | Office                         | Formal         | Male         | 45-60 | Village resident/local association             | Hunting                                                                   |
| C3         | La Vera    | Office                         | Formal         | Female       | 20-45 | Civil servant/Education                        | Large carnivore conservation/hunting                                      |
| C4a        | La Vera    | Farm visit/participant herding | Formal         | Male         | 45-60 | Village resident/local association/agriculture | Traditional farming and agriculture                                       |
| C4b        | La Vera    | Farm visit/participant herding | Formal         | Female       | 45-60 | Former shepherd/local association/agriculture  | Traditional farming and agriculture                                       |
| C5ab       | La Vera    | Farm visit/participant herding | Formal         | Male, Female | 45-60 | Goat farmers                                   | Traditional farming and agriculture                                       |
| C6         | La Vera    | Farm visit/participant herding | Formal         | Male         | 60-85 | Goat farmers                                   | Traditional farming and agriculture,                                      |
| C7         | La Vera    | Public space                   | Formal         | Male         | 45-60 | Cattle farmers                                 | Traditional farming and agriculture                                       |
| C8         | La Vera    | Public space                   | Formal         | Male         | 20-45 | Village resident                               | Large carnivore conservation                                              |
| C9         | La Vera    | Public space                   | Formal         | Male         | 45-60 | Hunting sector                                 | Hunting                                                                   |
| C10        | La Vera    | Home                           | Formal         | Male         | 45-60 | Media/ conservationist                         | Nature restoration/large carnivore conservation                           |
| C11        | Regional   | Public space                   | Formal         | Male         | 45-60 | Academia/research                              | Traditional farming and agriculture, Countryside and landscape protection |
| C12a       | La Vera    | Public space                   | Formal         | Male         | 45-60 | Civil servant                                  | Protected area management/species protection                              |
| C12b       | La Vera    | Public space                   | Formal         | Male         | 45-60 | Civil servant                                  | Protected area management/species protection                              |
| C13        | La Vera    | Public space                   | Formal         | Male         | 45-60 | Farmer's union/cattle farmer                   | Traditional farming and agriculture                                       |
| C14        | La Vera    | Farm visit/participant herding | Formal         | Male         | 60-85 | Cattle farmer                                  | Traditional farming and agriculture                                       |
| C15        | La Vera    | Office                         | Formal         | Male         | 60-85 | Local authorities                              | Traditional farming and agriculture                                       |
| C16a       | La Vera    | Public space                   | Formal         | Male, female | 20-45 | Village residents                              | Large carnivore conservation                                              |
| C16b       | La Vera    | Public space                   | Informal       | Male         | 60-85 | Retired goat farmer                            | Traditional farming and agriculture                                       |

|               |             |                                |          |        |       |                                |                                                                   |
|---------------|-------------|--------------------------------|----------|--------|-------|--------------------------------|-------------------------------------------------------------------|
| <b>C17ab</b>  | La Vera     | Farm visit/participant herding | Formal   | Male   | 45-60 | Goat farmers                   | Traditional farming and agriculture                               |
| <b>C18</b>    | La Vera     | Public space                   | Formal   | Male   | 20-45 | Cattle farmer                  | Traditional farming and agriculture                               |
| <b>C19</b>    | La Vera     | Home                           | Formal   | Male   | 45-60 | NGO official/local association | Traditional farming and agriculture, large carnivore conservation |
| <b>C20</b>    | La Vera     | Home                           | Informal | Female | 20-45 | Village resident               | Traditional farming and agriculture                               |
| <b>C21</b>    | Independent | Office                         | Formal   | Male   | 45-60 | Research/academia              | Veterinary science                                                |
| <b>C22</b>    | La Vera     | Office                         | Formal   | Male   | 45-60 | Civil servant                  | Species conservation/nature restoration                           |
| <b>C23</b>    | La Vera     | Office                         | Formal   | Male   | 45-60 | Civil servant                  | Farming and agriculture                                           |
| <b>C24</b>    | La Vera     | Office                         | Formal   | Female | 20-45 | Civil servant/business sector  | Nature tourism sector/depopulation                                |
| <b>C25</b>    | La Vera     | Public space                   | Formal   | Male   | 20-45 | Hunter/village resident        | Hunter                                                            |
| <b>C26</b>    | La Vera     | Public space                   | Formal   | Male   | 20-45 | Goat farmer                    | Traditional farming and agriculture                               |
| <b>C27</b>    | La Vera     | Public space                   | Formal   | Male   | 45-60 | Hunting sector                 | Hunting                                                           |
| <b>C28</b>    | Regional    | Public space                   | Formal   | Female | 45-60 | Regional authorities           | Large carnivore conservation                                      |
| <b>C29a**</b> | Independent | Farm visit/participant herding | Formal   | Male   | 60-85 | Sheep farmer/hunting sector    | Traditional farming and agriculture, hunting                      |
| <b>C29b**</b> | Independent | Farm visit/participant herding | Formal   | Male   | 60-85 | Sheep farmer                   | Traditional farming and agriculture                               |

| Independent stakeholders |             |                 |                |        |       |                   |                                                                           |
|--------------------------|-------------|-----------------|----------------|--------|-------|-------------------|---------------------------------------------------------------------------|
| Code                     | Location    | Interview venue | Interview type | Gender | Age   | Category          | Property/specialty*                                                       |
| <b>R1</b>                | Independent | Public space    | Informal       | Male   | 45-60 | Research/academia | Large carnivore conservation                                              |
| <b>R2</b>                | Independent | Online          | Formal         | Male   | 20-45 | NGO official      | Traditional farming and agriculture, Countryside and landscape protection |
| <b>R3</b>                | Independent | Public space    | Informal       | Male   | 45-60 | NGO official      | Depopulation/Land abandonment, Traditional farming and agriculture        |

\* *Property/specialty denotes the particular knowledge, position or profession for which the informant was interviewed.*

\*\* *These stakeholders were located in the area of the lynx reintroduction program in the south of the region. The program, is a model/inspiration for the wolf management plan in the region. Their experiences of the project were thus relevant to explore the possible implications of the wolf program in La Vera.*

2. Table SI2. Documentaries and programs on human-carnivore interactions or rural areas in Spain, which together with media articles and academic publications contextualized primary data.

| Code | Year       | Region                        | Name/ program                                                                 | Description                                                                                                                                                                                                                                                       | Initiative/ production                           | URL                                                                                                                                                                                                                                                                                                 |
|------|------------|-------------------------------|-------------------------------------------------------------------------------|-------------------------------------------------------------------------------------------------------------------------------------------------------------------------------------------------------------------------------------------------------------------|--------------------------------------------------|-----------------------------------------------------------------------------------------------------------------------------------------------------------------------------------------------------------------------------------------------------------------------------------------------------|
| D1   | 2017       | Ávila, Asturias, Zamora       | Convivencia - Ganadería y Lobos?                                              | Documentary produced on the initiative of a national farming about whether coexistence between wolves and farming is possible. Interviews with farmers, NGO staff, and other relevant stakeholders                                                                | UPA - Unión de Pequeños Agricultores y Ganaderos | <a href="http://ganaderiaylobos.es/">http://ganaderiaylobos.es/</a>                                                                                                                                                                                                                                 |
| D2   | 2018       | Zamora, Asturias The Pyrenees | Daños Cero                                                                    | Interview with a shepherd in the Pyrenees who is using LGDs for wolf defence, with additional footage from Zamora and Asturias. Produced by one of the most prominent wolf protection NGOs in Spain.                                                              | Lobo Marley                                      | <a href="https://www.youtube.com/watch?fbclid=IwAR3lu9OeS1xto7y8qQMpxHg1SIOquAF8DAHahkit o9koy4QT-oGku0iOuDw&amp;v=kR3L6-4wEsM&amp;feature=youtu.be">https://www.youtube.com/watch?fbclid=IwAR3lu9OeS1xto7y8qQMpxHg1SIOquAF8DAHahkit o9koy4QT-oGku0iOuDw&amp;v=kR3L6-4wEsM&amp;feature=youtu.be</a> |
| D3   | 2018       | Ávila, Asturias, Zamora       | Pastando con Lobos                                                            | Episode about coexistence with wolves on ‘El Escarabejo Verde’: a TV programme which has been working for over 20 years in the dissemination of environmental issues. Interviews of farmers, civil servants and business associated with or impacted by the wolf. | Spanish TV 2                                     | <a href="https://www.rtve.es/alacarta/videos/el-escarabajo-verde/escarabajo-verde-pastando-lobos/4866608/">https://www.rtve.es/alacarta/videos/el-escarabajo-verde/escarabajo-verde-pastando-lobos/4866608/</a>                                                                                     |
| D4   | 2016, 2018 | Ávila, Asturias, Zamora       | ‘Vivir con lobos’. And ‘ Coexistencia entre la ganadería extensiva y el lobo’ | Interviews with farmers who are coexisting with wolves through preventative methods. Part of the campaign ‘Living with Wolves’ by a conservation NGO, which identified and coordinated around 60 farmers in favour of coexistence.                                | Foundation Ecologistas en Acción                 | <a href="https://www.ecologistasenaccion.org/110007/video-coexistencia-entre-la-ganaderia-extensiva-y-el-lobo/">https://www.ecologistasenaccion.org/110007/video-coexistencia-entre-la-ganaderia-extensiva-y-el-lobo/</a>                                                                           |
| D5   | 2019       | National                      | Barabecho                                                                     | Documentary about the impact of depopulation, the importance of small-scale family farms and the people who have decided to stay in the countryside, based on interviews and site visits. Produced by a national farming syndicate.                               | UPA - Unión de Pequeños Agricultores y Ganaderos | <a href="http://barbecho.es/">http://barbecho.es/</a>                                                                                                                                                                                                                                               |
| D6   | 2015, 2020 | Zamora                        | El Arcón                                                                      | Episodes about the influence of the wolf on the tourism sector from Sanabria (2015) and La Culebra (2020) on El Arcón, a programme on TV CyL that interviews stakeholders associated to natural, cultural and gastronomical heritage and tourism within CyL.      | Castilla Y León TV channel 7                     | <a href="https://www.cyltv.es/programa/el-arcon">https://www.cyltv.es/programa/el-arcon</a>                                                                                                                                                                                                         |



|           |      |                     |                   |                                                                                                                                                                                                                                                                                                                                  |                                                    |                                                                                                                                                                                                                             |
|-----------|------|---------------------|-------------------|----------------------------------------------------------------------------------------------------------------------------------------------------------------------------------------------------------------------------------------------------------------------------------------------------------------------------------|----------------------------------------------------|-----------------------------------------------------------------------------------------------------------------------------------------------------------------------------------------------------------------------------|
| <b>D7</b> | 2020 | Zamora and Asturias | Tierra de Todos   | Episode from Spain, part of an audio-visual project of more than 30 testimonies from different sectors from 17 European countries, with the aim of showing that coexistence with large European carnivores is possible. Produced by WWF as a part of an EU life project on carnivore conservation.                               | WWF and LIFE Euro Large Carnivores                 | <a href="https://www.wwf.es/nuestro_trabajo/especies_y_habitats/grandes_carnivoros_europeos/en_tierra_de_todos/">https://www.wwf.es/nuestro_trabajo/especies_y_habitats/grandes_carnivoros_europeos/en_tierra_de_todos/</a> |
| <b>D8</b> | n/a  | La Vera             | El Lince en Botas | El Lince con Botas: a documentary series on Canal Sur Extremadura, with interviews of stakeholders about the cultural, environmental and human diversity of the Extremadura community, including episodes about the last shepherds, the impact of the growing hunting sector and Tuberculosis on the traditional farming sector. | El Lince con Botas on TV channel 'Sur Extremadura' | <a href="http://libreproducciones.es/?page_id=279">http://libreproducciones.es/?page_id=279</a>                                                                                                                             |

3. Table SI3. NVivo Code book. Initial structure deriving from the coexistence framework (grey and colored fields). The remaining themes emerged from the interview and observation data or secondary sources during the course of the analysis.

| Main category             | Framework codes                                                                                         | Description                                                                                                                                               |
|---------------------------|---------------------------------------------------------------------------------------------------------|-----------------------------------------------------------------------------------------------------------------------------------------------------------|
| 1. Coexistence conditions | Conditions highlighted as instrumental for ensuring, enabling or improving local coexistence capacities |                                                                                                                                                           |
|                           | Effective institutions - managed risk                                                                   |                                                                                                                                                           |
|                           | Conflict mitigation                                                                                     | Programs and initiatives to mediate disputes and improve attitudes to/awareness of wolves in local communities                                            |
|                           | Financial instruments                                                                                   |                                                                                                                                                           |
|                           | Compensation                                                                                            |                                                                                                                                                           |
|                           | Ex-ante payments                                                                                        |                                                                                                                                                           |
|                           | Knowledge dissemination                                                                                 | About wolves or the governance of them                                                                                                                    |
|                           | Lobo Iberico Center                                                                                     | Interpretation center in S-LC                                                                                                                             |
|                           | Legal frameworks                                                                                        | Laws and regulation which protects wolves                                                                                                                 |
|                           | Traditional livestock practices                                                                         | Guardian dogs, fences, nighttime enclosures                                                                                                               |
|                           | Wolf extraction                                                                                         | Approaches to lethal control and zooning                                                                                                                  |
|                           | Current hunting practices                                                                               | Descriptions                                                                                                                                              |
|                           | Lethal control                                                                                          | Extraction by administration                                                                                                                              |
|                           | Wolf hunting                                                                                            | Extraction by hunters (trophies)                                                                                                                          |
|                           | Social Legitimacy                                                                                       |                                                                                                                                                           |
|                           | Attitudes and perceptions                                                                               | Sense/perceptions of wolves belonging to the system, respect, fascination, fear (lack thereof), responsibility etc. (i.e. tolerance/acceptance attitudes) |
|                           | Economic benefits                                                                                       |                                                                                                                                                           |
|                           | Hunting incomes                                                                                         | Income from hunting licenses                                                                                                                              |
|                           | Tourism                                                                                                 | Incomes and other benefits from wolf tourism                                                                                                              |
|                           | Ecosystem services                                                                                      | Awareness of benefits of the wolf, such as regulation of sick animals and mitigation of zoonosis outbreaks                                                |
|                           | Wolf persistence                                                                                        |                                                                                                                                                           |
|                           | SES factors and idiosyncrasies                                                                          |                                                                                                                                                           |
|                           | Current characteristics                                                                                 |                                                                                                                                                           |
|                           | Hunting sector                                                                                          | Characteristics and perceptions of the local hunting sector                                                                                               |
|                           | Landscape                                                                                               | Habitat conditions ( topography, forest and scrub cover)                                                                                                  |
|                           | Population density                                                                                      | Geography and density of human habitation and (vs natural surroundings)                                                                                   |
|                           | Wildlife populations                                                                                    | Specifically ungulates                                                                                                                                    |

|                                       |                                                                                                           |                                                                                                                                                                     |
|---------------------------------------|-----------------------------------------------------------------------------------------------------------|---------------------------------------------------------------------------------------------------------------------------------------------------------------------|
|                                       | <b>Historic factors</b>                                                                                   | Key (historical) events, conditions, and factors within the social-ecological system (SES) that have shaped the current state of human-carnivore interactions (HCR) |
|                                       | HCR                                                                                                       | Past to present interactions, management, attitudes and perceptions toward Large Carnivores (LCs) and other wildlife                                                |
|                                       | <i>Attitudes</i>                                                                                          | How people used to think about wolves                                                                                                                               |
|                                       | <i>Felix Rodriguez de la Fuente</i>                                                                       | The influence of a famous Spanish naturalist on HCR                                                                                                                 |
|                                       | <i>Management</i>                                                                                         | How carnivores were governed, from the local to the EU level                                                                                                        |
|                                       | <i>Stories and folklore</i>                                                                               | About LCs and the encounters with them                                                                                                                              |
|                                       | <i>Wildlife populations</i>                                                                               | Historical population status and dynamics of carnivores and ungulates in the area                                                                                   |
|                                       | <i>Disappearance</i>                                                                                      | When and how did wolves disappear/become extinct                                                                                                                    |
|                                       | <i>Return</i>                                                                                             | When and how did wolves return                                                                                                                                      |
|                                       | <b>Nature protection</b>                                                                                  | How and when protected/special management areas were declared, their characteristics and how they have developed                                                    |
|                                       | <i>La Sierra</i>                                                                                          | Hunting reserve                                                                                                                                                     |
|                                       | <i>Lago de Sanabria</i>                                                                                   | Natural park                                                                                                                                                        |
|                                       | <i>Meseta Iberica Biosphere Reserve</i>                                                                   | Recently declared trans-frontier (Spain and Portugal) UNESCO heritage site, including Sanabria and Sierra de la Culebra.                                            |
|                                       | <i>Picos de Europa</i>                                                                                    | National park                                                                                                                                                       |
|                                       | <i>Sierra de la Culebra</i>                                                                               | Regional hunting reserve                                                                                                                                            |
|                                       | <b>Social and cultural factors</b>                                                                        | Population and village development and dynamics, cultural traditions, practices and management of the land                                                          |
|                                       | <i>Farming system and landscape</i>                                                                       | Past to current characteristics of the landscape and farming practices                                                                                              |
|                                       | <i>Perceptions about the past</i>                                                                         | Villages, quality of life etc.                                                                                                                                      |
| <b>2. Threats and vulnerabilities</b> | <b>Factors within the SES that are inhibiting, preventing or undermining local coexistence capacities</b> |                                                                                                                                                                     |
|                                       | <b>Depopulation</b><br>Rural abandonment: trends, causes and concerns                                     |                                                                                                                                                                     |
|                                       | <b>Leave attitudes</b>                                                                                    | Expressed reasons to leave rural areas and why life in urban areas is more attractive                                                                               |
|                                       | <b>Infrastructure</b>                                                                                     | Issues related to roads, internet etc.                                                                                                                              |
|                                       | <b>Job opportunities</b>                                                                                  | Perceptions about professional development options in rural areas                                                                                                   |
|                                       | <i>Lack of initiative</i>                                                                                 | Views that there are local opportunities, but that local people are unwilling or unable to take advantage of them                                                   |

|  |                                                                               |                                                                                                                                                    |
|--|-------------------------------------------------------------------------------|----------------------------------------------------------------------------------------------------------------------------------------------------|
|  | <i>No opportunities</i>                                                       | Views that there are few local professional options or development routes                                                                          |
|  | <i>Outsourcing</i>                                                            | Local contracts and jobs outsourced to actors and firms who do not reside in the area                                                              |
|  | <b>Loss of community cohesion</b>                                             | Effects of depopulation and individualism on local abilities to collaborate and support each other                                                 |
|  | <b>Seasonality</b>                                                            | Tendencies of tourists and associated business opportunities to be concentrated to a few months of the year                                        |
|  | <b>Social services</b>                                                        | Schools, health care etc.                                                                                                                          |
|  | <b>Taxes and incentives</b>                                                   | Lack of economic benefits and support                                                                                                              |
|  | <b>Underused potential</b>                                                    | E.g. mushrooms, deer meat, forestry                                                                                                                |
|  | <b>Farming viability</b>                                                      |                                                                                                                                                    |
|  | Factors relating to the resilience of small-scale traditional farm operations |                                                                                                                                                    |
|  | <b>Bureaucracy</b>                                                            | Administrative/paper-work burden                                                                                                                   |
|  | <b>Distribution of products</b>                                               | Elements that hinder distinction of products and short market chains: butchers, regulation, farmers' markets, intermediaries, promotion, awareness |
|  | <i>Geographic protection and brands</i>                                       | Certification and brands for quality: lack thereof or barriers to entry                                                                            |
|  | <i>Industrial vs traditional</i>                                              | Processes and factors that promote industrial over traditional farming practices                                                                   |
|  | <b>Distrust and disunity</b>                                                  | Within the farming community                                                                                                                       |
|  | <b>Education levels</b>                                                       | Of farmers                                                                                                                                         |
|  | <b>Financial instruments</b>                                                  |                                                                                                                                                    |
|  | <i>CAP</i>                                                                    |                                                                                                                                                    |
|  | <i>Incentives and start-up support</i>                                        |                                                                                                                                                    |
|  | <i>Services to nature</i>                                                     | (Lack of) recognition of farmers' maintenance of public goods                                                                                      |
|  | <i>Spanish piquaresca</i>                                                     | From a local expression describing how people (try to) cheat, corrupt and benefit from the system                                                  |
|  | <b>Land access</b>                                                            | Pastures and barns etc.                                                                                                                            |
|  | <b>Livestock diseases</b>                                                     | Tuberculosis and brucellosis                                                                                                                       |
|  | <b>Modernization, quality of life</b>                                         | Discrepancy between life of farmers and the rest of society                                                                                        |
|  | <b>Profitability and costs</b>                                                | Price of outputs (meat and milk), costs of inputs (feed etc)                                                                                       |
|  | <b>Status, societal norms</b>                                                 | Urban and rural attitudes towards the countryside, farming and farmers                                                                             |
|  | <b>Wolf damages and mitigation</b>                                            | Negative impacts of wolves on livestock and game                                                                                                   |
|  | <i>Compensation</i>                                                           | Support for of loss and/or damage to livestock                                                                                                     |
|  | <i>Domestic dogs</i>                                                          | Damages of domestic dogs on livestock and the possible confusion of these with wolf damages                                                        |

|  |                                                                                                                                                                          |                                                                                                                                                             |
|--|--------------------------------------------------------------------------------------------------------------------------------------------------------------------------|-------------------------------------------------------------------------------------------------------------------------------------------------------------|
|  | <i>Guardian dogs</i>                                                                                                                                                     | Costs, effectiveness, legal support, interactions with domestic dogs and members of the public                                                              |
|  | <i>Insurance</i>                                                                                                                                                         | Costs, bureaucracy, perceived fairness                                                                                                                      |
|  | <i>Statistics</i>                                                                                                                                                        | Current figures and the degree to which they represent the reality                                                                                          |
|  | <b>Formal institutions</b>                                                                                                                                               |                                                                                                                                                             |
|  | Efficiency, transparency, perceptivity of governing administrations, institutions and funding programs                                                                   |                                                                                                                                                             |
|  | <b>Efficiency, trust and legitimacy</b>                                                                                                                                  | People's perception about the (in)capacity of local and regional administrations to perform their intended function and adhere to local (rural) needs.      |
|  | <b>Fortress conservation, compositionism</b>                                                                                                                             | Perceptions related to directions of conservation policy that excludes local people, and which fails to perform holistic biocultural diversity conservation |
|  | <b>Information, transparency</b>                                                                                                                                         | Provision and access to information about landscape and species governance                                                                                  |
|  | <b>Laws and regulation</b>                                                                                                                                               |                                                                                                                                                             |
|  | <b>Participation</b>                                                                                                                                                     | Degree of participatory decision-making                                                                                                                     |
|  | <b>Support</b>                                                                                                                                                           | Ability of institutions to provide required support                                                                                                         |
|  | <b>Wolf management plan</b>                                                                                                                                              | Issues relating to the development and function of the plan                                                                                                 |
|  | <i>North vs. South of Duero</i>                                                                                                                                          | Discrepancy in governance and its social and ecological effects                                                                                             |
|  | <b>Stereotypes, beliefs</b>                                                                                                                                              |                                                                                                                                                             |
|  | Node gathering perceptions about "the other" that are replicated throughout different groups and which may contribute to polarization                                    |                                                                                                                                                             |
|  | <b>About farmers</b>                                                                                                                                                     |                                                                                                                                                             |
|  | <b>About politicians, conservationists and tourists</b>                                                                                                                  |                                                                                                                                                             |
|  | <b>About wolves</b>                                                                                                                                                      | Incongruous beliefs about wolves                                                                                                                            |
|  | <b>Media</b>                                                                                                                                                             | Tendencies and impacts of news- and social media on HCR                                                                                                     |
|  | <b>Knowledge silos, disconnection</b>                                                                                                                                    |                                                                                                                                                             |
|  | How (types of) knowledge is transferred and valued along urban-rural, administration-local and research-practice communities                                             |                                                                                                                                                             |
|  | <b>Hunting</b>                                                                                                                                                           |                                                                                                                                                             |
|  | General info about hunting and the hunting sector; views and perceptions regarding lethal control and hunting of wolves; trends and values related to the hunting sector |                                                                                                                                                             |
|  | Friction with tourism                                                                                                                                                    | The impact on hunting on wildlife watching interests                                                                                                        |
|  | Hunting ban                                                                                                                                                              | Popular movement for the prohibition of wolf hunting                                                                                                        |
|  | Hunting values                                                                                                                                                           | Societal perceptions and values associated with being a hunter                                                                                              |
|  | Poaching                                                                                                                                                                 | Of wolves                                                                                                                                                   |
|  | Prices of game                                                                                                                                                           | Price dynamics of hunting permits (wolves and ungulates)                                                                                                    |
|  | Resistance to hunting practices                                                                                                                                          | Due to practical implications                                                                                                                               |
|  | Wolf impact on game                                                                                                                                                      | Local ungulate populations and trophy sector                                                                                                                |

|                  |                                                                                                                                     |                                                                                                                                                       |
|------------------|-------------------------------------------------------------------------------------------------------------------------------------|-------------------------------------------------------------------------------------------------------------------------------------------------------|
| <b>3. Trends</b> | <b>Tendencies within the SES that are impacting traditional farming practices, rural areas and human-carnivore relations</b>        |                                                                                                                                                       |
|                  | <b>T1. Landscape use</b>                                                                                                            |                                                                                                                                                       |
|                  | Changing uses and perceived purpose of rural landscapes                                                                             |                                                                                                                                                       |
|                  | <b>Land ownership, commons</b>                                                                                                      | Changes in the way rural land is owned and (communally) managed                                                                                       |
|                  | <b>Nature and wildlife tourism</b>                                                                                                  | Demand on nature-based experiences and tendencies of nature commodification and its implications on traditional practices                             |
|                  | <i>Friction with locals</i>                                                                                                         | Visitors vs residents                                                                                                                                 |
|                  | <b>Nature protection and restoration</b>                                                                                            | Conservation, rewilding, and restoration perceptions and agendas                                                                                      |
|                  | <b>“Neo-rurals”</b>                                                                                                                 | New types of village residents moving in                                                                                                              |
|                  | <b>T2. Land abandonment</b>                                                                                                         |                                                                                                                                                       |
|                  | Processes of rural abandonment and decrease of traditional farming practices and associated impacts on the social-ecological system |                                                                                                                                                       |
|                  | <b>Biodiversity</b>                                                                                                                 |                                                                                                                                                       |
|                  | <b>Population, culture, practices</b>                                                                                               |                                                                                                                                                       |
|                  | <b>Scrub, forest, pastures</b>                                                                                                      |                                                                                                                                                       |
|                  | <b>Wildfires</b>                                                                                                                    |                                                                                                                                                       |
|                  | <b>T3. Livestock preferences and management systems</b>                                                                             |                                                                                                                                                       |
|                  | Changes in livestock types, quantities and management practices                                                                     |                                                                                                                                                       |
|                  | <b>T4. Wildlife populations</b>                                                                                                     |                                                                                                                                                       |
|                  | Changes related to wildlife populations dynamics and numbers; associated perceptions and beliefs about wildlife populations         |                                                                                                                                                       |
|                  | <b>Bears</b>                                                                                                                        |                                                                                                                                                       |
|                  | <b>Lynx</b>                                                                                                                         |                                                                                                                                                       |
|                  | <b>Ungulates</b>                                                                                                                    |                                                                                                                                                       |
|                  | <i>Diseases</i>                                                                                                                     |                                                                                                                                                       |
|                  | <b>Wolves</b>                                                                                                                       |                                                                                                                                                       |
|                  | <i>Bold wolves</i>                                                                                                                  | Changed hunting patterns leading to increased overlap with humans                                                                                     |
|                  | <b>T5. Value orientations</b>                                                                                                       |                                                                                                                                                       |
|                  | Of the countryside, nature and wildlife and associated impacts on HCI                                                               |                                                                                                                                                       |
|                  | <b>Diets and consumption</b>                                                                                                        | Changes to food preferences and demand                                                                                                                |
|                  | <b>Farmers and farming</b>                                                                                                          | Perceptions and values associated to farmers and being a farmer                                                                                       |
|                  | <i>Pride of coexistence farmers</i>                                                                                                 | Increasing status and recognition of farmers who are coexisting with wolves, tendencies of adopting them as ambassadors for wolf conservation agendas |
|                  | <b>Wildlife value orientation</b>                                                                                                   | Shifting values and perceptions of wildlife and associated impacts on HCR                                                                             |
|                  | <i>Stories and emotions</i>                                                                                                         | Inspired by LCs and encounters with them                                                                                                              |

|                               |                                                                                                                                                                                  |                                                                                                                                               |
|-------------------------------|----------------------------------------------------------------------------------------------------------------------------------------------------------------------------------|-----------------------------------------------------------------------------------------------------------------------------------------------|
|                               | <b>T6. Infrastructure</b><br>Internet, distribution chains, transport                                                                                                            |                                                                                                                                               |
|                               | <b>T7. Covid 19</b><br>Impacts of the Corona pandemic (which broke out during fieldwork) on local systems                                                                        |                                                                                                                                               |
| <b>4. Lessons from return</b> | <b>Impacts of wolf return on SES and associated policy response, mistakes and successes. From Location B (+ perspectives from Ávila and Guadarrama)</b>                          |                                                                                                                                               |
| <b>5. Preparing for LCs</b>   | <b>Views on how areas should act before LC return in order to mitigate or avoid negative impacts and social tensions, and the difficulties associated with this preparation.</b> |                                                                                                                                               |
|                               | <b>Case C</b>                                                                                                                                                                    |                                                                                                                                               |
|                               | <i>Current strategy</i>                                                                                                                                                          | Perceptions about whether, and how, the administration is preparing for LCs (strategy and methods for enhancing local coexistence conditions) |
|                               | <i>Reaction, impact</i>                                                                                                                                                          | Informants' beliefs about how the local system (social dynamics, hunting and farming practices) will be impacted by wolf return.              |
|                               | <i>When</i>                                                                                                                                                                      | Informants' beliefs about when wolves will be back to case C                                                                                  |
|                               | <b>Proposed actions</b>                                                                                                                                                          | Respondents' aspirations (from case C) and advice (from respondents in case A and B) on how to prepare local systems for the return of LCs    |
|                               | <i>Ecological interventions</i>                                                                                                                                                  |                                                                                                                                               |
|                               | <i>Science and research</i>                                                                                                                                                      |                                                                                                                                               |
|                               | <i>Social interventions</i>                                                                                                                                                      |                                                                                                                                               |
| <b>6. Future</b>              | <b>Informant's wishes and beliefs about the future of the local system and the relations with wolves within them.</b>                                                            |                                                                                                                                               |
|                               | <b>1. Aspirations and needs</b>                                                                                                                                                  |                                                                                                                                               |
|                               | What do informants want/what do they think is needed to maintain, enhance or improve HCI and the conditions for small-scale farming.                                             |                                                                                                                                               |
|                               | <b>Environmental</b>                                                                                                                                                             |                                                                                                                                               |
|                               | <i>Landscapes</i>                                                                                                                                                                | Appearance and function                                                                                                                       |
|                               | <i>Wildlife populations and management</i>                                                                                                                                       | How do people want wildlife populations to be managed? Where do they want them? In what densities? (Control, hunting and zoning)              |
|                               | <b>Funds, support</b>                                                                                                                                                            |                                                                                                                                               |
|                               | <i>CAP</i>                                                                                                                                                                       | Changes to the EU agricultural policy                                                                                                         |
|                               | <i>Compensation</i>                                                                                                                                                              | Of livestock damages                                                                                                                          |
|                               | <i>Infrastructure</i>                                                                                                                                                            | For farms and rural communities                                                                                                               |
|                               | <i>Services to nature, greening</i>                                                                                                                                              | Recognition of traditional practices and rural biodiversity to ecosystem functioning, benefit provision and resiliency                        |
|                               | <i>Taxes and incentives</i>                                                                                                                                                      | To counter loss of small-scale agriculture and depopulation                                                                                   |
|                               | <b>Governance</b>                                                                                                                                                                |                                                                                                                                               |
|                               | <i>Distribution, distinction</i>                                                                                                                                                 | Of products from farms that are beneficial for biocultural diversity                                                                          |

|                  |                                                                                                                                                                     |                                                                                                |
|------------------|---------------------------------------------------------------------------------------------------------------------------------------------------------------------|------------------------------------------------------------------------------------------------|
|                  | <i>Mediation; pragmatism; transparency</i>                                                                                                                          | Of programs, policies and in human-human relations                                             |
|                  | <i>Mitigation</i>                                                                                                                                                   | Ex-ante payments and programs to support preventative measures and enhance adaptive capacities |
|                  | <i>Place-based management, participatory governance</i>                                                                                                             | Perceptivity of administration to local characteristics and associated policy design           |
|                  | <i>Policy and programs</i>                                                                                                                                          | Adjustments and innovation in rural/species governance                                         |
|                  | <b>Social</b>                                                                                                                                                       |                                                                                                |
|                  | <i>(Re)connection with nature</i>                                                                                                                                   | Environmental and cultural education etc.                                                      |
|                  | <i>Acknowledgement</i>                                                                                                                                              | Desired attitude changes with relation to traditional practice and species                     |
|                  | <i>Cooperation and commons</i>                                                                                                                                      | Aspirations related to the (return of) communal management of lands and flocks                 |
|                  | <i>Professional development</i>                                                                                                                                     | To enable modernization of traditional practices and livelihoods                               |
|                  | <i>Social services</i>                                                                                                                                              | In rural communities                                                                           |
|                  | <b>2. Beliefs about the future</b><br>Informants' answers to the question "what do you think about the future of this area/where will this area be in 20-30 years?" |                                                                                                |
|                  | Coexistence, possible                                                                                                                                               |                                                                                                |
|                  | Coexistence, impossible                                                                                                                                             |                                                                                                |
| <b>8. Zoning</b> | <b>Informants' perceptions and ideas about how LCs are, could or should be governed on a territorial level</b>                                                      |                                                                                                |
